# Supplementary material for: Synergy of Au–Pt for Enhancing Ethylene Photodegradation Performance of Flower-like TiO2
Source: MDPI journal article supplement (doi:10.3390/nano12183221), 2022-09-16
Supplement: s1 [file s1]

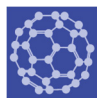

# Synergy of Au–Pt for Enhancing Ethylene Photodegradation Performance of Flower-like $\text{TiO}_2$

Wanzhen Meng <sup>1</sup>, Yunrui Zhao <sup>1</sup>, Dujuan Dai <sup>1</sup>, Qianqian Zhang <sup>1,\*</sup>, Zeyan Wang <sup>1</sup>, Yuanyuan Liu <sup>1</sup>, Zhaoke Zheng <sup>1</sup>, Hefeng Cheng <sup>1</sup>, Ying Dai <sup>2</sup>, Baibiao Huang <sup>1</sup> and Peng Wang <sup>1,\*</sup>

<sup>1</sup> State Key Laboratory of Crystal Materials, Shandong University, Jinan 250100, China

<sup>2</sup> School of Physics, Shandong University, Jinan 250100, China

\* Correspondence: zhangqianqian@sdu.edu.cn (Q.Z.); pengwangicm@sdu.edu.cn (P.W.)

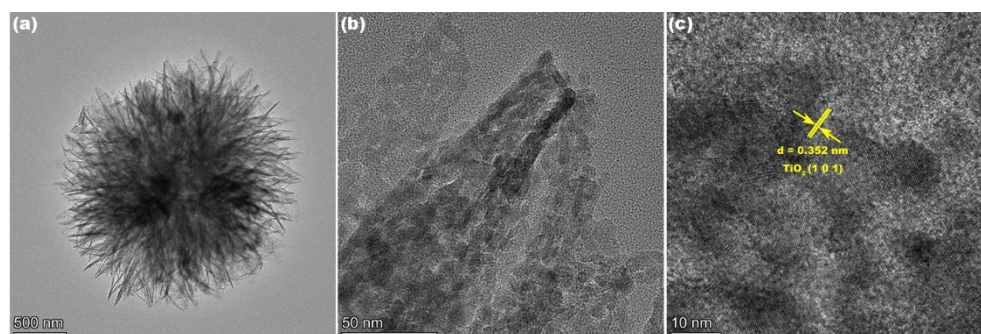

**Figure S1.** a, b)TEM, c) HRTEM images of  $\text{TiO}_2$  MSs.

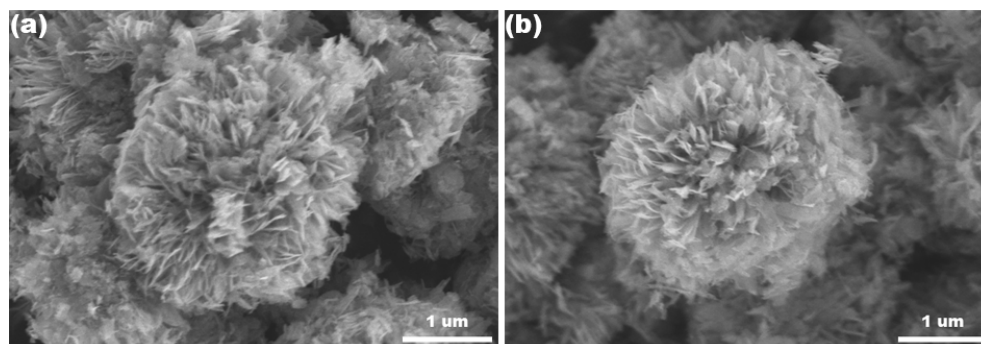

**Figure S2.** SEM images of a) Au- $\text{TiO}_2$  and b) Pt- $\text{TiO}_2$ .

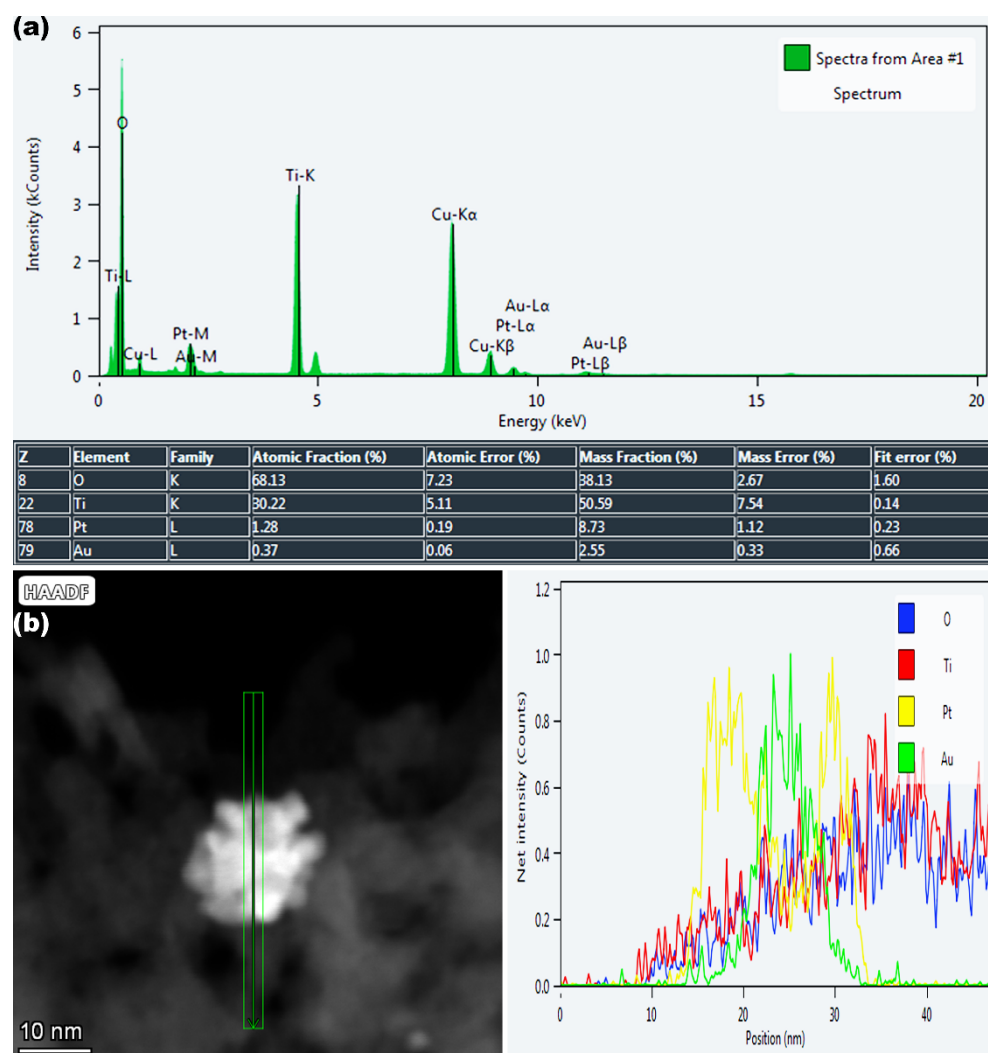

**Figure S3.** a) EDS spectrum and b) EDS line scan spectra of AuPt-TiO<sub>2</sub>.

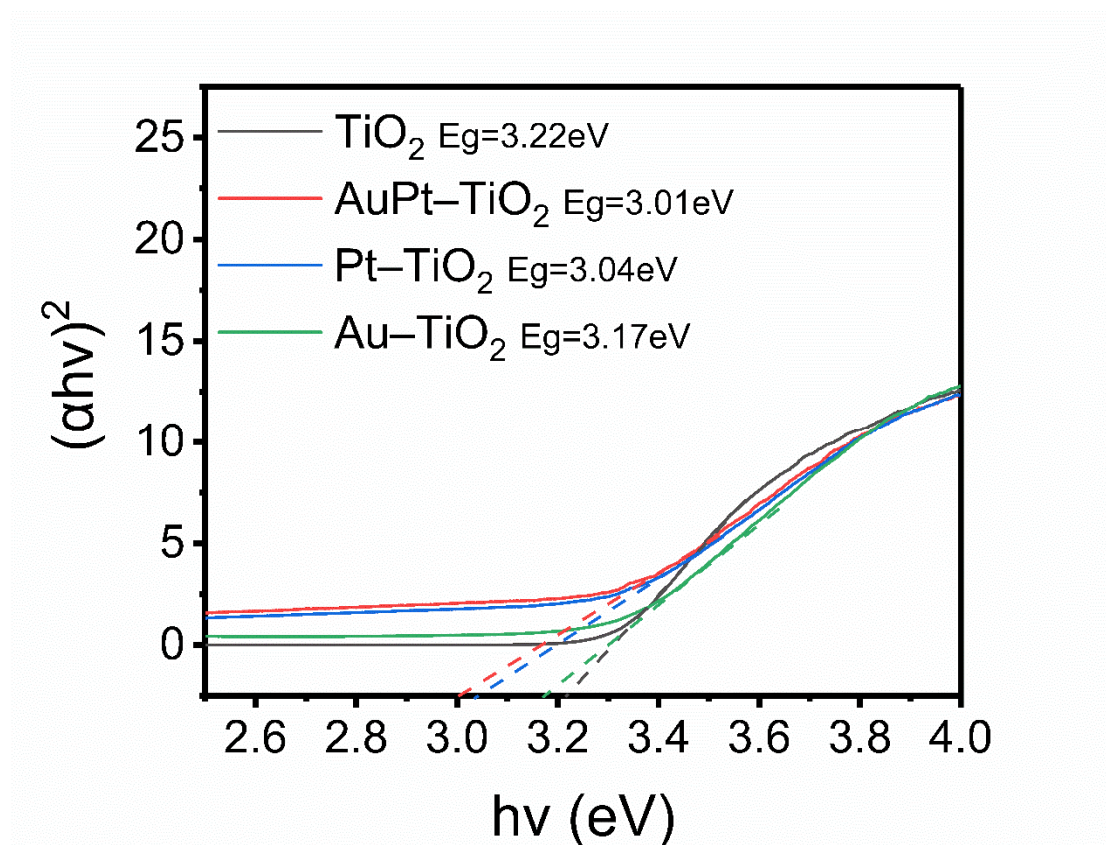

**Figure S4** Tauc plots of TiO<sub>2</sub> MSs, AuPt- TiO<sub>2</sub>, Pt-TiO<sub>2</sub> and Au-TiO<sub>2</sub>.

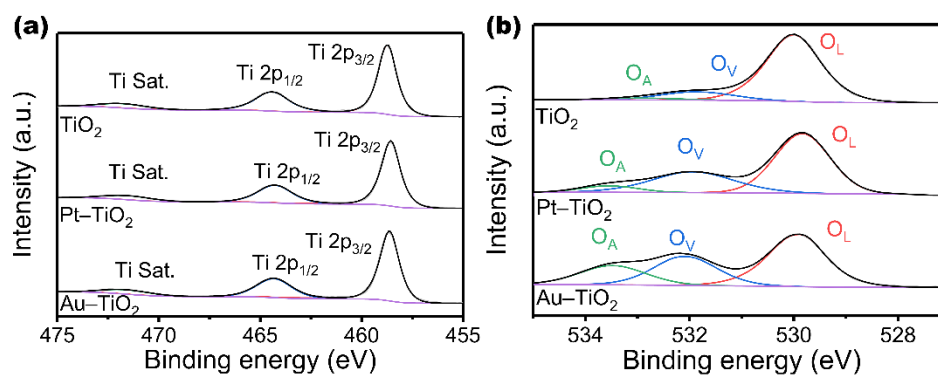

**Figure S5.** a) Ti 2p and b) O 1s XPS spectra of TiO<sub>2</sub>, Pt- TiO<sub>2</sub> and Au-TiO<sub>2</sub>.

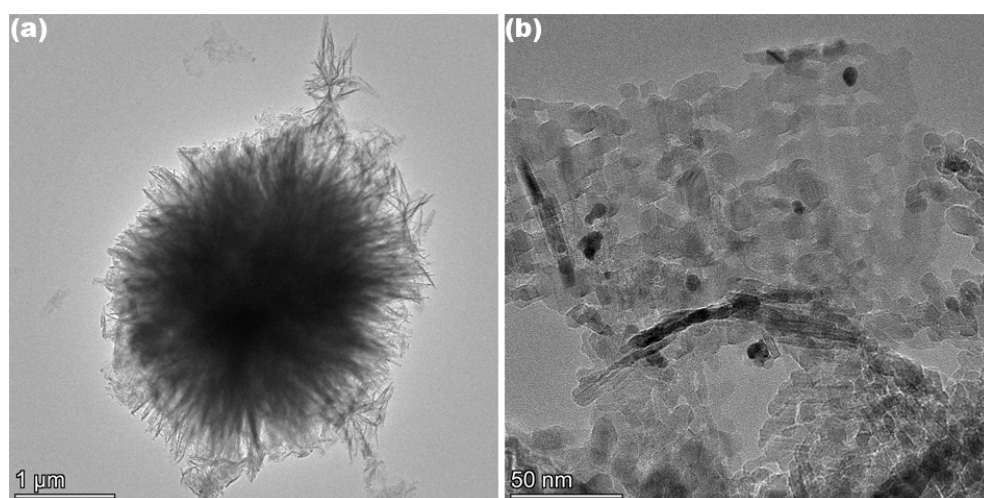

**Figure S6.** a, b)TEM, HRTEM images of AuPt-TiO<sub>2</sub> after 5 cycles stability test.

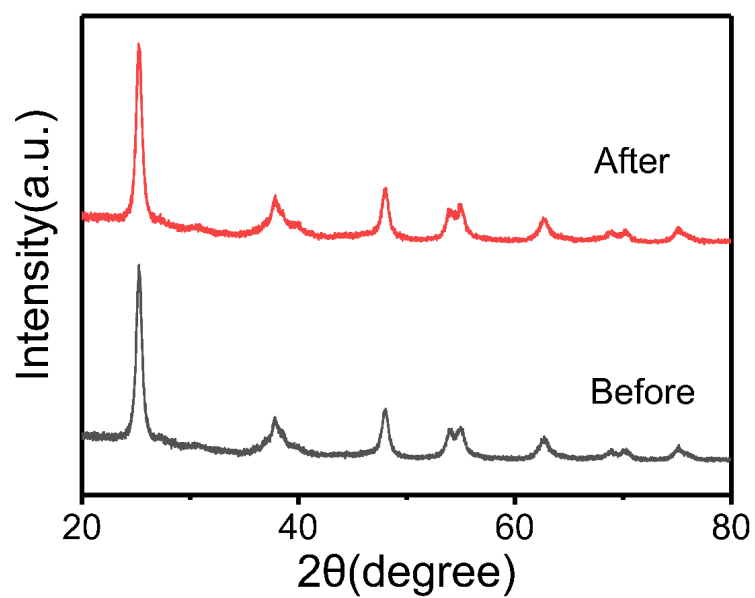

**Figure S7.** XRD pattern of AuPt-TiO<sub>2</sub> before and after 5 cycles stability test.

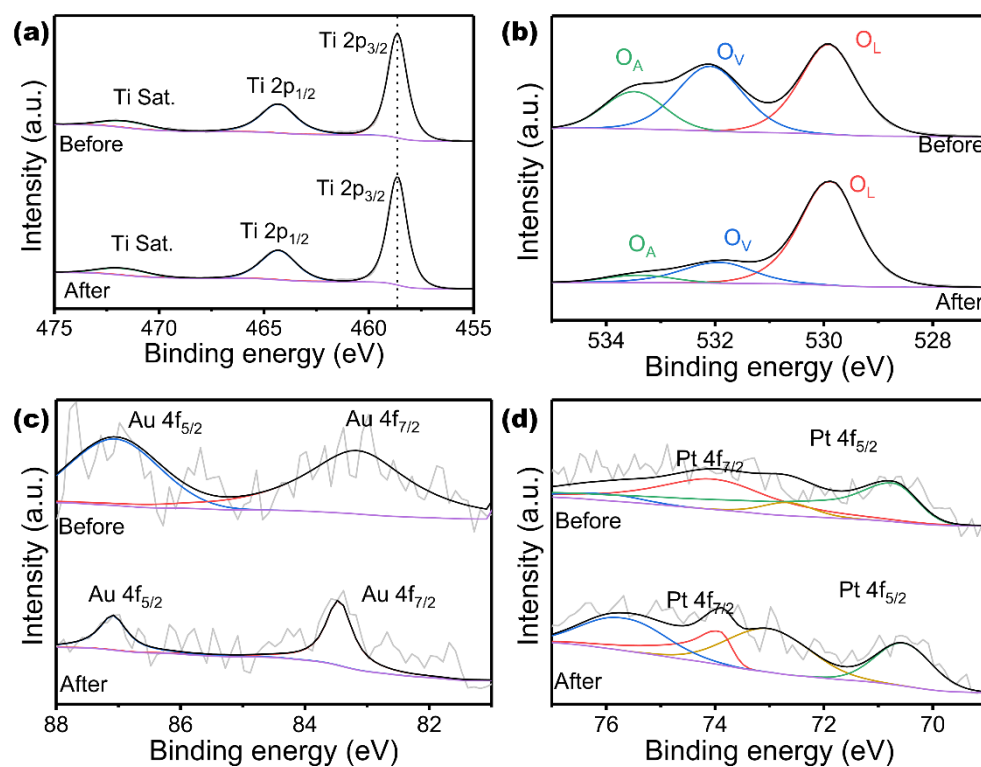

**Figure S8.** a) Ti 2p, b) O 1s, c) Au 4f and d) Pt 4f XPS spectra of AuPt-TiO<sub>2</sub> before and after 5 cycles stability test.

**Table S1.** Surface area and porosity of TiO<sub>2</sub> MSs and AuPt-TiO<sub>2</sub>.

| Samples               | Surface Area (m <sup>2</sup> /g) | Pore Volume (cm <sup>3</sup> /g) | Pore Size (nm) |
|-----------------------|----------------------------------|----------------------------------|----------------|
| TiO <sub>2</sub> MSs  | 92.05                            | 0.5488                           | 11.9           |
| AuPt-TiO <sub>2</sub> | 104.5                            | 0.7487                           | 14.3           |
